# Supplementary material
Source: publisher figshare collection journal article supplement (https://sage.figshare.com/ndownloader/files/18044504)
Supplement: Supplementary file 1 [file 18044504]

| <i>Please indicate the degree to which you think each of the following components are important factors in the recovery of persons with serious mental illnesses.</i> | <i>Mean<br/>SD</i> | <i>Skewness</i> | <i>Not at<br/>all<br/>importa<br/>nt</i> | <i>%<br/>n</i> |   | <i>%<br/>n</i> |   | <i>%<br/>n</i> |   | <i>%<br/>n</i> | <i>Very<br/>important</i> | <i>%<br/>n</i> |
|-----------------------------------------------------------------------------------------------------------------------------------------------------------------------|--------------------|-----------------|------------------------------------------|----------------|---|----------------|---|----------------|---|----------------|---------------------------|----------------|
| 1. Being connected to something larger than oneself (e.g., sense of spirituality)                                                                                     | 4.29<br>.903       | -1.24           | 1                                        | 1.2<br>1       | 2 | 2.3<br>2       | 3 | 14.0<br>12     | 4 | 26.7<br>23     | 5                         | 48.8<br>42     |
| 2. Having a sense of hope                                                                                                                                             | 4.84<br>.481       | -3.12           | 1                                        | 0              | 2 | 0              | 3 | 4.7<br>4       | 4 | 5.8<br>5       | 5                         | 86.0<br>74     |
| 3. Being stably housed                                                                                                                                                | 4.85<br>.425       | -2.85           | 1                                        | 0              | 2 | 0              | 3 | 2.3<br>2       | 4 | 10.5<br>9      | 5                         | 84.9<br>73     |
| 4. Being abstinent from drugs and alcohol                                                                                                                             | 4.44<br>.918       | -1.88           | 1                                        | 2.3<br>2       | 2 | 1.2<br>1       | 3 | 10.5<br>9      | 4 | 19.8<br>17     | 5                         | 61.6<br>53     |
| 5. Being employed in a competitive job                                                                                                                                | 3.59<br>.993       | -.24            | 1                                        | 2.3<br>2       | 2 | 8.1<br>7       | 3 | 36.0<br>31     | 4 | 29.1<br>25     | 5                         | 19.8<br>17     |
| 6. Eliminating all psychiatric symptoms                                                                                                                               | 3.05<br>1.18       | -.14            | 1                                        | 10.5<br>9      | 2 | 22.1<br>19     | 3 | 24.4<br>21     | 4 | 29.1<br>25     | 5                         | 9.3<br>8       |
| 7. Having family support                                                                                                                                              | 4.51<br>.760       | -1.33           | 1                                        | 0              | 2 | 1.2<br>1       | 3 | 11.6<br>10     | 4 | 19.8<br>17     | 5                         | 61.6<br>53     |

|                                                         |              |       |   |          |   |          |   |            |   |            |   |            |
|---------------------------------------------------------|--------------|-------|---|----------|---|----------|---|------------|---|------------|---|------------|
| 8. Having friends and/or romantic partners              | 4.34<br>.757 | -1.02 | 1 | 0        | 2 | 2.3<br>2 | 3 | 9.3<br>8   | 4 | 37.2<br>32 | 5 | 46.5<br>40 |
| 9. Adhering to prescribed treatments                    | 4.51<br>.832 | -1.58 | 1 | 0        | 2 | 3.5<br>3 | 3 | 10.5<br>9  | 4 | 16.3<br>14 | 5 | 66.3<br>57 |
| 10. Learning how to live with psychiatric symptoms      | 4.74<br>.540 | -2.53 | 1 | 0        | 2 | 1.2<br>1 | 3 | 1.2<br>1   | 4 | 18.6<br>16 | 5 | 74.4<br>64 |
| 11. Having a sense of belonging to a community          | 4.65<br>.591 | -1.53 | 1 | 0        | 2 | 0        | 3 | 5.8<br>5   | 4 | 22.1<br>19 | 5 | 69.8<br>60 |
| 12. Taking control of one's own life                    | 4.56<br>.590 | -1.35 | 1 | 0        | 2 | 1.2<br>1 | 3 | 1.2<br>1   | 4 | 36.0<br>31 | 5 | 57.0<br>49 |
| 13. Having a sense of purpose and meaning in life       | 4.83<br>.464 | -2.84 | 1 | 0        | 2 | 0        | 3 | 3.5<br>3   | 4 | 9.3<br>8   | 5 | 83.7<br>72 |
| 14. Having good quality medical care                    | 4.89<br>.316 | -2.52 | 1 | 0        | 2 | 0        | 3 | 0          | 4 | 10.5<br>9  | 5 | 83.7<br>72 |
| 15. Believing in oneself as a capable person            | 4.65<br>.614 | -1.58 | 1 | 0        | 2 | 0        | 3 | 7.0<br>6   | 4 | 19.8<br>17 | 5 | 69.8<br>60 |
| 16. Having a sense of home                              | 4.63<br>.603 | -1.39 | 1 | 0        | 2 | 0        | 3 | 5.8<br>5   | 4 | 23.3<br>20 | 5 | 64.0<br>55 |
| 17. Being financially independent                       | 3.64<br>1.06 | -.67  | 1 | 4.7<br>4 | 2 | 8.1<br>7 | 3 | 25.6<br>22 | 4 | 38.4<br>33 | 5 | 20.9<br>18 |
| 18. Participating in social and recreational activities | 4.31<br>.776 | -.92  | 1 | 0        | 2 | 2.3<br>2 | 3 | 11.6<br>10 | 4 | 37.2<br>32 | 5 | 46.5<br>40 |

|                                                                     |              |       |   |          |   |          |   |            |   |            |   |            |
|---------------------------------------------------------------------|--------------|-------|---|----------|---|----------|---|------------|---|------------|---|------------|
| 19. Having an extended period of stability (i.e., free from crises) | 4.37<br>.794 | -1.37 | 1 | 1.2<br>1 | 2 | 0        | 3 | 11.6<br>10 | 4 | 32.6<br>28 | 5 | 50.0<br>43 |
| 20. Eating well and exercising                                      | 4.43<br>.765 | -1.08 | 1 | 0        | 2 | 1.2<br>1 | 3 | 12.8<br>11 | 4 | 26.7<br>23 | 5 | 57.0<br>49 |

| <i>Please indicate the degree to which you agree or disagree with the following statements.</i>                          | <i>Mean<br/>SD</i> | <i>Skewness</i> | <i>Fully<br/>disagree</i> | <i>%<br/>n</i> |   | <i>%<br/>n</i> | <i>Neutral</i> | <i>%<br/>n</i> |   | <i>%<br/>n</i> | <i>Fully<br/>agree</i> | <i>%<br/>n</i> |
|--------------------------------------------------------------------------------------------------------------------------|--------------------|-----------------|---------------------------|----------------|---|----------------|----------------|----------------|---|----------------|------------------------|----------------|
| 1. Most people with serious mental illnesses are not employed                                                            | 3.02<br>1.28       | -.16            | 1                         | 12.8<br>11     | 2 | 14.0<br>12     | 3              | 18.6<br>16     | 4 | 22.1<br>19     | 5                      | 9.3<br>8       |
| 2. Most people with serious mental illnesses do not want to work                                                         | 2.06<br>1.21       | 1.00            | 1                         | 33.7<br>29     | 2 | 19.8<br>17     | 3              | 12.8<br>11     | 4 | 5.8<br>5       | 5                      | 4.7<br>4       |
| 3. Most people with serious mental illnesses should focus on taking care of themselves and shouldn't be expected to work | 2.17<br>1.08       | .43             | 1                         | 29.1<br>25     | 2 | 18.6<br>16     | 3              | 23.3<br>20     | 4 | 8.1<br>7       | 5                      | 1.2<br>1       |
| 4. A person's preferences for working or not working should be followed                                                  | 3.39<br>1.23       | -.09            | 1                         | 4.7<br>4       | 2 | 14.0<br>12     | 3              | 26.7<br>23     | 4 | 11.6<br>10     | 5                      | 20.9<br>18     |
| 5. A person's preferences for the kind of work he or she would like to do should be respected as much as possible        | 4.33<br>.92        | -1.68           | 1                         | 2.3<br>1       | 2 | 1.2<br>1       | 3              | 9.3<br>8       | 4 | 27.9<br>24     | 5                      | 47.7<br>41     |

|                                                                                                                                                                                                      |              |       |   |            |   |            |   |            |   |            |   |            |
|------------------------------------------------------------------------------------------------------------------------------------------------------------------------------------------------------|--------------|-------|---|------------|---|------------|---|------------|---|------------|---|------------|
| 6. Having a goal of obtaining employment is often important to recovery                                                                                                                              | 4.34<br>.87  | -1.72 | 1 | 2.3<br>2   | 2 | 0          | 3 | 9.3<br>8   | 4 | 30.2<br>26 | 5 | 46.5<br>40 |
| 7. Families should encourage their loved one with a serious mental illness to work as part of his or her recovery                                                                                    | 3.94<br>.92  | -.56  | 1 | 1.2<br>1   | 2 | 2.3<br>2   | 3 | 23.3<br>20 | 4 | 29.1<br>25 | 5 | 26.7<br>23 |
| 8. Families should discourage their loved one with a serious mental illness from working until he or she is well enough to do so independently                                                       | 2.35<br>1.12 | .34   | 1 | 22.1<br>19 | 2 | 18.6<br>16 | 3 | 23.3<br>20 | 4 | 9.3<br>8   | 5 | 2.3<br>2   |
| 9. Families should be consulted before their loved one with a serious mental illness is encouraged to work by a mental health provider                                                               | 2.79<br>1.24 | .09   | 1 | 15.1<br>13 | 2 | 20.9<br>18 | 3 | 19.8<br>17 | 4 | 19.8<br>17 | 5 | 7.0<br>6   |
| 10. Employment is not that important a goal for a person with a serious mental illness and should not be pursued until the person has achieved other recovery goals (e.g., clinical stability) first | 2.59<br>1.28 | .313  | 1 | 22.1<br>19 | 2 | 16.3<br>14 | 3 | 25.6<br>22 | 4 | 10.5<br>9  | 5 | 8.1<br>7   |
| 11. Families should discourage their loved one with a serious mental illness from seeking employment because working is stressful and might make him or her sicker or precipitate a relapse          | 2.03<br>1.00 | .914  | 1 | 29.1<br>25 | 2 | 30.2<br>26 | 3 | 17.4<br>15 | 4 | 3.5<br>3   | 5 | 2.3<br>2   |

|                                                                                                                                                                                |              |       |   |          |   |            |   |            |   |            |   |            |
|--------------------------------------------------------------------------------------------------------------------------------------------------------------------------------|--------------|-------|---|----------|---|------------|---|------------|---|------------|---|------------|
| 12. Families should encourage their loved one with a serious mental illness to get a job because it will offer him or her a valued social role or a positive sense of identity | 4.01<br>.93  | -.740 | 1 | 1.2<br>1 | 2 | 3.5<br>3   | 3 | 19.8<br>17 | 4 | 32.6<br>28 | 5 | 31.4<br>27 |
| 13. People with serious mental illnesses should receive personalized benefits counseling to encourage them to seek financial independence                                      | 4.06<br>.83  | -.26  | 1 | 0        | 2 | 1.2<br>1   | 3 | 22.1<br>19 | 4 | 30.2<br>26 | 5 | 29.1<br>25 |
| 14. A major reason why more people with serious mental illnesses do not work is because they face employment discrimination                                                    | 4.14<br>.93  | -1.04 | 1 | 1.2<br>1 | 2 | 2.3<br>2   | 3 | 12.8<br>11 | 4 | 25.6<br>22 | 5 | 31.4<br>27 |
| 15. A major reason why more people with serious mental illnesses do not work is because there are no programs to help them find jobs                                           | 3.33<br>1.22 | -.34  | 1 | 7.0<br>6 | 2 | 10.5<br>9  | 3 | 20.9<br>18 | 4 | 20.9<br>18 | 5 | 14.0<br>12 |
| 16. A major reason why more people with serious mental illnesses do not work is because they cannot get on the job training and/or support                                     | 3.73<br>1.07 | -.75  | 1 | 3.5<br>3 | 2 | 4.7<br>4   | 3 | 18.6<br>16 | 4 | 27.9<br>24 | 5 | 18.6<br>16 |
| 17. People with serious mental illnesses should be encouraged to work regardless of the severity of their symptoms or other difficulties                                       | 2.89<br>1.22 | .31   | 1 | 8.1<br>7 | 2 | 25.6<br>22 | 3 | 19.8<br>17 | 4 | 12.8<br>11 | 5 | 10.5<br>9  |

|                                                                                                                   |              |     |   |            |   |            |   |            |   |          |   |            |
|-------------------------------------------------------------------------------------------------------------------|--------------|-----|---|------------|---|------------|---|------------|---|----------|---|------------|
| they experience associated with their illness                                                                     |              |     |   |            |   |            |   |            |   |          |   |            |
| 18. People with serious mental illnesses should be monitored carefully for potential signs of violence on the job | 2.82<br>1.47 | .35 | 1 | 17.4<br>15 | 2 | 19.8<br>17 | 3 | 18.6<br>16 | 4 | 3.5<br>3 | 5 | 18.6<br>16 |

| <i>Please indicate the degree to which each issue poses a challenge to persons with serious mental illnesses in obtaining and/or retaining a job.</i> | <i>Mean<br/>SD</i> | <i>Skewness</i> | <i>Not at all<br/>a<br/>challenge</i> | <i>%<br/>n</i> |   | <i>%<br/>n</i> | <i>Neutral</i> | <i>%<br/>n</i> |   | <i>%<br/>n</i> | <i>Very<br/>much of<br/>a<br/>challenge</i> | <i>%<br/>n</i> |
|-------------------------------------------------------------------------------------------------------------------------------------------------------|--------------------|-----------------|---------------------------------------|----------------|---|----------------|----------------|----------------|---|----------------|---------------------------------------------|----------------|
| 1. Stable housing                                                                                                                                     | 4.51<br>.68        | -1.07           | 1                                     | 0              | 2 | 0              | 3              | 8.1<br>7       | 4 | 23.3<br>20     | 5                                           | 50.0<br>43     |
| 2. Childcare needs (e.g., afterschool activities, child with special needs)                                                                           | 4.35<br>.83        | -1.63           | 1                                     | 1.2<br>1       | 2 | 1.2<br>1       | 3              | 5.8<br>5       | 4 | 27.9<br>24     | 5                                           | 37.2<br>32     |
| 3. Other family members' needs (e.g., parent who needs assistance)                                                                                    | 4.09<br>.81        | -.52            | 1                                     | 0              | 2 | 2.3<br>2       | 3              | 15.1<br>13     | 4 | 33.7<br>29     | 5                                           | 26.7<br>23     |
| 4. Family and/or peer support to pursue employment                                                                                                    | 3.97<br>.80        | -.65            | 1                                     | 1.2<br>1       | 2 | 0              | 3              | 19.8<br>17     | 4 | 38.4<br>33     | 5                                           | 20.9<br>18     |
| 5. Physical health needs (e.g., medical appointments, visiting nurse)                                                                                 | 4.19<br>.78        | -.72            | 1                                     | 0              | 2 | 2.3<br>2       | 3              | 11.6<br>10     | 4 | 37.2<br>32     | 5                                           | 32.6<br>28     |
| 6. Side effects of medications (e.g., drowsiness, tremor)                                                                                             | 4.39<br>.80        | -1.19           | 1                                     | 0              | 2 | 2.3<br>2       | 3              | 9.3<br>8       | 4 | 24.4<br>21     | 5                                           | 46.5<br>40     |
| 7. Need for transportation                                                                                                                            | 4.44<br>.83        | -1.79           | 1                                     | 1.2<br>1       | 2 | 1.2<br>1       | 3              | 7.0<br>6       | 4 | 23.3<br>20     | 5                                           | 48.8<br>42     |



|                                                                             |              |       |   |          |   |          |   |            |   |            |   |            |
|-----------------------------------------------------------------------------|--------------|-------|---|----------|---|----------|---|------------|---|------------|---|------------|
| 8. Difficulties in reading                                                  | 3.65<br>1.23 | -.65  | 1 | 5.8<br>5 | 2 | 5.8<br>5 | 3 | 18.6<br>16 | 4 | 19.8<br>17 | 5 | 22.1<br>19 |
| 9. Difficulties in speaking or understanding English                        | 3.55<br>1.27 | -.46  | 1 | 5.8<br>5 | 2 | 7.0<br>6 | 3 | 19.8<br>17 | 4 | 14.0<br>12 | 5 | 20.9<br>18 |
| 10. Employment history or gaps in his resume                                | 4.18<br>.85  | -1.11 | 1 | 1.2<br>1 | 2 | 1.2<br>1 | 3 | 11.6<br>10 | 4 | 33.7<br>29 | 5 | 31.4<br>27 |
| 11. Concerns about losing disability benefits                               | 4.41<br>.94  | -1.63 | 1 | 1.2<br>1 | 2 | 2.3<br>2 | 3 | 9.3<br>8   | 4 | 14.0<br>12 | 5 | 47.7<br>41 |
| 12. Concerns about facing discrimination on the job                         | 4.33<br>.93  | -1.78 | 1 | 2.3<br>2 | 2 | 1.2<br>1 | 3 | 7.0<br>6   | 4 | 24.4<br>21 | 5 | 41.9<br>36 |
| 13. Low self-esteem or self-confidence                                      | 4.49<br>.81  | -1.96 | 1 | 1.2<br>1 | 2 | 1.2<br>1 | 3 | 5.8<br>5   | 4 | 23.3<br>20 | 5 | 52.3<br>45 |
| 14. Need to develop job skills or be comfortable on the job site            | 4.37<br>.78  | -1.51 | 1 | 1.2<br>1 | 2 | 0        | 3 | 8.1<br>7   | 4 | 30.2<br>26 | 5 | 41.9<br>36 |
| 15. Seriousness of criminal justice involvement (e.g., felony, violence)    | 4.03<br>.97  | -.51  | 1 | 0        | 2 | 4.7<br>4 | 3 | 18.6<br>16 | 4 | 19.8<br>17 | 5 | 30.2<br>26 |
| 16. Symptoms of mental illness (e.g., hallucination, depression)            | 4.39<br>.74  | -1.02 | 1 | 0        | 2 | 1.2<br>1 | 3 | 8.1<br>7   | 4 | 26.7<br>23 | 5 | 40.7<br>35 |
| 17. Difficulties attending to personal care needs (e.g., hygiene, clothing) | 4.09<br>.96  | -.99  | 1 | 1.2<br>1 | 2 | 4.7<br>4 | 3 | 12.8<br>11 | 4 | 30.2<br>26 | 5 | 32.6<br>28 |
| 18. Substance or alcohol use or addiction                                   | 4.12<br>1.03 | -1.12 | 1 | 2.3<br>2 | 2 | 2.3<br>2 | 3 | 15.1<br>13 | 4 | 20.9<br>18 | 5 | 36.0<br>31 |

|                                                                         |              |       |   |           |   |          |   |            |   |            |   |            |
|-------------------------------------------------------------------------|--------------|-------|---|-----------|---|----------|---|------------|---|------------|---|------------|
| 19. Domestic violence                                                   | 3.70<br>1.25 | -.65  | 1 | 4.7<br>4  | 2 | 7.0<br>6 | 3 | 15.1<br>13 | 4 | 16.3<br>14 | 5 | 23.3<br>20 |
| 20. Need to take regular breaks or withdraw from stimulation or people  | 3.78<br>1.01 | -.45  | 1 | 1.2<br>1  | 2 | 7.0<br>6 | 3 | 22.1<br>19 | 4 | 26.7<br>23 | 5 | 22.1<br>19 |
| 21. Need access to internet and/or to develop computer skills           | 3.67<br>1.01 | -.54  | 1 | 2.3<br>2  | 2 | 5.8<br>5 | 3 | 22.1<br>19 | 4 | 27.9<br>24 | 5 | 16.3<br>14 |
| 22. Need for additional support or meaningful activities outside of job | 4.09<br>.93  | -1.23 | 1 | 2.3<br>2  | 2 | 1.2<br>1 | 3 | 12.8<br>11 | 4 | 33.7<br>29 | 5 | 29.1<br>25 |
| 23. Difficulties with job interviews                                    | 4.24<br>.82  | -1.16 | 1 | 1.2<br>1  | 2 | 0        | 3 | 11.6<br>10 | 4 | 31.4<br>27 | 5 | 33.7<br>29 |
| 24. Difficulties getting up on time in the morning                      | 3.97<br>.83  | -.43  | 1 | 0         | 2 | 3.5<br>3 | 3 | 17.4<br>15 | 4 | 36.0<br>31 | 5 | 22.1<br>19 |
| 25. Previous negative experiences with employment                       | 4.11<br>.76  | -.39  | 1 | 0         | 2 | 1.2<br>1 | 3 | 16.3<br>4  | 4 | 38.4<br>33 | 5 | 27.9<br>24 |
| 26. Not knowing what you would be good at doing                         | 3.99<br>.83  | -.29  | 1 | 0         | 2 | 2.3<br>2 | 3 | 20.9<br>18 | 4 | 33.7<br>29 | 5 | 24.4<br>21 |
| 27. Owe back child support                                              | 3.02<br>1.26 | -.23  | 1 | 10.5<br>9 | 2 | 7.0<br>6 | 3 | 19.8<br>17 | 4 | 15.1<br>13 | 5 | 7.0<br>6   |
| 28. Immigration status (fears deportation, doesn't have working papers) | 3.51<br>1.36 | -.39  | 1 | 5.8<br>5  | 2 | 7.0<br>6 | 3 | 16.3<br>14 | 4 | 8.1<br>7   | 5 | 19.8<br>17 |
| 29. Needs a driver's license or state-issued identification card        | 3.61<br>1.19 | -.58  | 1 | 5.8<br>5  | 2 | 5.8<br>5 | 3 | 23.3<br>20 | 4 | 20.9<br>18 | 5 | 22.1<br>19 |

|                                                                                                                                   |              |       |   |          |   |            |   |            |   |            |   |            |
|-----------------------------------------------------------------------------------------------------------------------------------|--------------|-------|---|----------|---|------------|---|------------|---|------------|---|------------|
| 30. Needs own car                                                                                                                 | 3.56<br>1.24 | -.60  | 1 | 7.0<br>6 | 2 | 8.1<br>7   | 3 | 18.6<br>16 | 4 | 24.4<br>21 | 5 | 20.9<br>18 |
| 31. Have been advised not to work in the past by professionals for fear it would be too stressful or precipitate a relapse        | 3.54<br>1.15 | -.64  | 1 | 4.7<br>4 | 2 | 5.8<br>5   | 3 | 16.3<br>14 | 4 | 23.3<br>20 | 5 | 12.8<br>11 |
| 32. Family or friends have suggested working may not be good for the person's mental health                                       | 3.29<br>1.22 | -.43  | 1 | 9.3<br>8 | 2 | 7.0<br>6   | 3 | 24.4<br>21 | 4 | 22.1<br>19 | 5 | 12.8<br>11 |
| 33. Jobs that have been suggested/offered feel menial or unfulfilling                                                             | 3.73<br>1.02 | -.31  | 1 | 0        | 2 | 11.6<br>10 | 3 | 18.6<br>16 | 4 | 26.7<br>23 | 5 | 20.9<br>18 |
| 34. Expectations for treatment or program compliance interfere with job search and/or work activities                             | 3.82<br>.91  | -.89  | 1 | 2.3<br>2 | 2 | 2.3<br>2   | 3 | 18.6<br>16 | 4 | 37.2<br>32 | 5 | 16.3<br>14 |
| 35. Concerns about having to disclose mental illness during a job interview or flexibility/accommodations are required on the job | 4.30<br>.85  | -1.08 | 1 | 0        | 2 | 3.5<br>3   | 3 | 9.3<br>8   | 4 | 25.6<br>22 | 5 | 39.5<br>34 |
| 36. Perceptions that people with mental illness may become violent in the workplace                                               | 3.97<br>1.09 | -.91  | 1 | 0        | 2 | 2.3<br>2   | 3 | 5.8<br>5   | 4 | 23.3<br>20 | 5 | 30.2<br>26 |
